# Supplementary material for: Tumor-derived extracellular vesicles regulate tumor-infiltrating regulatory T cells via the inhibitory immunoreceptor CD300a
Source: eLife. 2021 Nov 9;10:e61999. doi: 10.7554/eLife.61999 (PMC8577836; doi:10.7554/eLife.61999)
Supplement: Figure 1—source data 1. [file elife-61999-fig1-data1.xlsx]

## Sheet: Fig1_source data 1
A.												B.
date	WT					Cd300a-/-						Days	WT	CD300a-/-
0	0	0	0	0	0	0	0	0	0	0		30		1
11	0	0	0	0	0	0	0	0	0	0		35		1
14	0	0	0	0	0	0.042	0	0	0	0		42		1
15	0	0.132	0.024	0	0.079	0.523	0.256	0.065	0.028	0.065		46		1
18	0.014	0.95	0.151	0	0.628	4.187	2.355	4.187	0.368	0.105		42		1
21	0.256	2.355	0.628	0.132	0.904	9.18	3.14	14.13	0.942	0.335		40	1
24	2.355	5.233	0.823	0.335	1.539	12.2	11.4	14.1	2.35	1.88		48	1
												54	1
												54	1
												54	1
C.
date	Rag1-/-											Rag1-/- Cd300a-/-
	1	2	3	4	5	6	7	8	9	10	11	1	2	3	4	5	6	7	8	9	10	11	12	13	14	15
0	0	0	0	0	0	0	0	0	0	0	0	0	0	0	0	0	0	0	0	0	0	0	0	0	0	0
10	0.001	0.004	0.065	0	0.042	0	0	0	0	0.004	0.001	0.042	0.014	0	0	0	0.001	0.004	0.028	0.042	0.004	0.004	0	0	0.014	0.004
14	0.113	0.113	0.523	0	0.593	0	0	0	0.18	0.221	0.033	0.205	0.231	0	0.001	0.001	0.079	0.079	0.576	0.576	0.014	0.151	1.444	0.004	0.268	0.065
17	0.382	0.301	1.436	0.004	1.13	0.014	0	0	0.76	0.523	0.382	0.697	0.628	0.004	0.042	0.18	0.205	0.382	1.238	0.68	0.268	0.628	0.697	0.18	0.887	0.567
21	1.15	1.15	4.369	0.205	4.187	0.268	0.003	0.0065	1.535	1.238	0.628	1.184	1.766	0.113	0.205	0.904	0.523	1.15	4.187	1.415	0.268	1.055	1.15	0.382	2.144	1.539
25	2.144	3.778	6.367	0.387	4.605	0.335	0.18	0.18	3.59	2.144	2.144	3.778	2.722	0.321	0.382	0.904	1.766	2.278	4.187	3.778	0.904	3.222	2.722	0.904	4.847	4.187
D.
Days	Rag1-/-	Rag1-/- Cd300a-/-
48	1
59	1
32	1
30	1
41		1
41		1
30		1
48		1
51		1
30	1
45	1
30		1
37		1
42		1
30		1
45		1
50		1
F.
date	Cd300afl/fl							Itgax Cre Cd300afl/fl													LysM Cre Cd300afl/fl
	1	2	3	4	5	6	7	1	2	3	4	5	6	7	8	9	10	11	12	13	1	2	3	4	5	6	7	8	9	10	11	12	13	14	15
0	0	0	0	0	0	0	0	0	0	0	0	0	0	0	0	0	0	0	0	0	0	0	0	0	0	0	0	0	0	0	0	0	0	0	0
14	0.523	151	79	14	14	65	180	231	301	0	0	104.7	466	523	335	382	180	382	523	523	33	78.5	0	78.5	41.87	0	25.12	65.42	50.24	65	14	14	170	170	113
21	268	1238	904	424	382	785	1327	3327	2144	256	3305	2658	2874	2571	1641	2571	1436	3222	3590	2722	2002	1327	65	980	282	113	628	733	980	1426	335	523	1206	2144	950
25	576	1641	1884	1150	1150	2355	2473	4723	3391	576	9552	1641	4815	9683	3327	3391	3967	5572	7235	4847	4187	1766	180	2002	950	424	628	890	1130	2120	628	1150	3052	5539	2257
