# Supplementary material for: Tumor-derived extracellular vesicles regulate tumor-infiltrating regulatory T cells via the inhibitory immunoreceptor CD300a
Source: eLife. 2021 Nov 9;10:e61999. doi: 10.7554/eLife.61999 (PMC8577836; doi:10.7554/eLife.61999)
Supplement: Figure 2—figure supplement 1—source data 1. [file elife-61999-fig2-figsupp1-data1.xlsx]

## Sheet: Supplemetal Fig1_source data 1
A.
CD25 MFI			GITR MFI			BCL2 MFI
Cd300afl/fl	Cd300afl/fl Itgax-Cre		Cd300afl/fl	Cd300afl/fl Itgax-Cre		Cd300afl/fl	Cd300afl/fl Itgax-Cre
670	1046		41736	50295		142	156
495	1745		44404	42954		139	149
911	293		44627	51346		145	182
	318			47303			192
