# Supplementary material for: Tumor-derived extracellular vesicles regulate tumor-infiltrating regulatory T cells via the inhibitory immunoreceptor CD300a
Source: eLife. 2021 Nov 9;10:e61999. doi: 10.7554/eLife.61999 (PMC8577836; doi:10.7554/eLife.61999)
Supplement: Figure 2—source data 1. [file elife-61999-fig2-data1.xlsx]

## Sheet: Fig2_source data 1
A.
	WT							Cd300a-/-
	1	2	3	4	5	6	7	1	2	3	4	5	6	7	8
TIL	42.8	41.7	45.5	48.3	56.8	54.4	29.5	51	45	64.6	51.3	77.5	60.8	49	60.5
LN	25.8	15.7	30.5	21.3	26.6	14.7	28.3	17.6	31.6	20.9	23.5	24.9	15.5	25.6	19.8
B.
	WT	Cd300a-/-
1	13	60
2	31	40
3	53	86
4	23	105
5		97
6		52
7		47
C.
	CD300afl/fl											Itgax-cre CD300afl/fl
TIL	47.4	49.6	13.9	20.8	23	42.8	59.2	47.4	33.3	54.3	61.7	26.2	54	43.4	56.5	60	65.5	69.7	65.5	64	49.4	54.9
LN	11.9	11.2	37.2	18.4	18.3	14.7	14.4	16				17.1	13.7	17.1	27.4	22	13.8
D.	Ki67		E.	CTLA-4
	CD300afl/fl	Itgax-cre CD300afl/fl		CD300afl/fl	Itgax-cre CD300afl/fl
1	44.7	35	1	2457	3986
2	47.4	42.1	2	2951	3062
3	15	47.7	3	2275	4461
4	36.8	78.2	4		4791
5	31.4	75.7
6	64	84
7	63.5	81.5
8	59.6	87
9	83	75.7
10		78.2
F.
Days	WT control mAb							WT anti-CD25 mAb					Cd300a-/- control mAb								Cd300a-/- anti-CD25 mAb
	1	2	3	4	5	6	7	1	2	3	4	5	1	2	3	4	5	6	7	8	1	2	3	4	5	6
0	0	0	0	0	0	0	0	0	0	0	0	0	0	0	0	0	0	0	0	0	0	0	0	0	0	0
12	0.382	0.335	0.18	0.065	0.17	0.05	0.188	0.065	0.256	0.18	0.104	0.065	0.301	0.382	0.268	0.301	0.113	0.151	0.113	0.15	0.113	0.151	0.113	0.065	0.267	0.004
18	1.238	1.055	0.523	0.523	2.571	0.904	1.205	0.092	1.766	0.04	1.149	0.423	0.697	0.887	1.436	0.697	1.15	2.571	0.823	2.143	0.205	0.424	0.065	0.065	0.423	0.23
21	2.571	1.884	0.68	0.904	2.874	1.15	3.391	0.118	1.884	0.077	2.571	0.68	1.766	2.571	2.571	1.766	1.766	4.187	1.436	4.605	0.523	0.628	0.113	0.131	0.904	0.423
25	4.187	3.391	1.846	3.222	5.572	2.571	4.846	0.424	4.605	0.042	4.396	2.143	3.052	4.847	5.077	4.187	5.572	9.906	5.572	6.079	2.002	2.2278	0.382	0.23	1.766	1.13
G.
Days	Cd300afl/fl Ctrl Ab				Cd300afl/fl PC61			Itgx Cre Cd300afl/fl Ctrl Ab			Itgax Cre Cd300afl/fl PC61
	1	2	3	4	1	2	3	1	2	3	1	2	3	4	5
0	0	0	0	0	0	0	0	0	0	0	0	0	0	0	0
14	334.9	0	368	523	131.9	4.2	334.9	696.6	1149.8	823.2	523.3	4.2	179.5	423.9	267.9
20	1766.3	65.4	1766.3	1884	179.5	4.2	1538.6	3589.5	2277.5	2277.5	1149.8	696.6	179.5	33.5	1055
25	2472.8	113	1436	3052.1	179.5	14.1	1766.3	4396	3221	3778.5	823.2	1766.3	466.3	33.5	1130.4
H.
	WT						Cd300a-/-
	1	2	3	4	5	6	1	2	3	4	5	6
CD4	11.3	9.56	25.5	23.2	23.8	20.8	8.48	18.8	7.17	12	14	12.1
CD8	30.9	21.5	55.2	53.2	48	38.4	13.3	35.3	20.1	16.7	32.2	37.6
I.				J.			K.
	WT	Cd300a-/-		CD300afl/fl	Itgax-cre CD300afl/fl		CD300afl/fl	Itgax-cre CD300afl/fl
1	191	620		7.04	19.8		1642	3361
2	215	340		3.4	31.6		1084	2769
3	144	531		4.76	38.8		886	1753
4	336	1581			26.9			3055
5		2074			24.7
6		3505
