# Supplementary material for: Tumor-derived extracellular vesicles regulate tumor-infiltrating regulatory T cells via the inhibitory immunoreceptor CD300a
Source: eLife. 2021 Nov 9;10:e61999. doi: 10.7554/eLife.61999 (PMC8577836; doi:10.7554/eLife.61999)
Supplement: Figure 3—figure supplement 1—source data 1. [file elife-61999-fig3-figsupp1-data1.xlsx]

## Sheet: Supplemental Fig2_source data 1
B.
	GF WT	GF Cd300a-/-
1	13	57
2	32	39
3	20	79
4	22	45
5	11	96
6		51
7		45
C.
	GF WT					GF Cd300a-/-
	1	2	3	4	5	1	2	3	4	5	6
0	0	0	0	0	0	0	0	0	0	0	0
14	267.9	65.4	14.1	91.6	14.1	506	707	506	65.4	0	0
21	1436	1149	1766	1130	523	1766	3052	3778	523	1238	785
25	3391	3052	2143	2143	904	2001	3391	5572	3952	3778	3052
