# Supplementary material for: Tumor-derived extracellular vesicles regulate tumor-infiltrating regulatory T cells via the inhibitory immunoreceptor CD300a
Source: eLife. 2021 Nov 9;10:e61999. doi: 10.7554/eLife.61999 (PMC8577836; doi:10.7554/eLife.61999)
Supplement: Figure 3—source data 1. [file elife-61999-fig3-data1.xlsx]

## Sheet: Fig3_ source data 1
A.														B.
	WT						Cd300a-/-
	1	2	3	4	5	6	1	2	3	4	5	6
IFNb	1.016	1.167	0.816	0.398	1.407	1.195	1.088	3.912	1.308	1.726	1.077	1.908
IL-10	1.22	0.67	1.1	0.429	1.508	1.063	1.46	1.76	1.3	1.963	1.286	1.551
TGF	1.32	0.871	0.807	0.862	0.884	1.254	1.298	0.77	0.947	1.005	0.649	0.98
C.
times	WT							CD300a-/-
	1	2	3	4	5	6	7	1	2	3	4	5	6	7
0h	0.709	1.473	0.817	0.73	1.27	1.9	1.01	1.06	0.355	0.259	1.22	0.29	3.04	4.26
2.5h	3.48	3.083	3.24	2.94	4.22			1.607	2.957	1.278	2.97	1.54
4h	2.9	3.88	2.76	2.02	3.25	2.97	1	3.743	2.36	2.26	9.61	6.38	10.61	19.8
G.
	WT						CD300a-/-
	1	2	3	4	5	6	1	2	3	4	5	6
naive	1.062	1.069	0.869	1	0.686	1.458	0.234	1.824	0.318	1.027	0.509	2.073
HMGB-1	0.937	0.417	0.509				1.566	1.084	0.861
exosome	0.6	1.8	1.9	1.9	0.2		9.7	1.3	1.6	6.6	29.2
H.
	naive				B16 sup										Evs depleted B16 sup
WT	2.1246	0.791671	0.719467	0.364266	15.3835	4.76204	4.91848	4.70858	8.06912	8.97243	8.26902	0.366637	1.10764	17.1921	2.22445	2.04587	1.8555	13.0495	10.5777	10.9072	9.97543
CD300a-/-	1.14954	0.594081	1.11297	0.739095	28.5143	6.7467	7.7138	9.57681	15.8126	14.7629	22.6372				2.82154	2.29595	2.79984	7.61267	6.90992	6.75175	4.10587
I.
	WT EPT-MFG-E8			CD300a-/- EPT-MFG-E8			WT D89E-MFG-E8			CD300a-/- D89E-MFG-E8
Ifnb	0.643	0.155	2.659	11.21	103.6	3.22	2.343	1.48	3.707	3.461	2.993	4.002
