# Supplementary material for: Tumor-derived extracellular vesicles regulate tumor-infiltrating regulatory T cells via the inhibitory immunoreceptor CD300a
Source: eLife. 2021 Nov 9;10:e61999. doi: 10.7554/eLife.61999 (PMC8577836; doi:10.7554/eLife.61999)
Supplement: Figure 4—figure supplement 1—source data 1. [file elife-61999-fig4-figsupp1-data1.xlsx]

## Sheet: Supplemental Fig3_source data 1
	WTDC+nTreg	CD300a-/- DC+ nTreg
	15	17
	15	15
	20	20
