# Supplementary material for: Tumor-derived extracellular vesicles regulate tumor-infiltrating regulatory T cells via the inhibitory immunoreceptor CD300a
Source: eLife. 2021 Nov 9;10:e61999. doi: 10.7554/eLife.61999 (PMC8577836; doi:10.7554/eLife.61999)
Supplement: Figure 4—source data 1. [file elife-61999-fig4-data1.xlsx]

## Sheet: Fig4_source data 1
A.						B.
	control mAb		anti-IFN mAb				Cd300a fl/fl iso							Cd300a fl/fl Itgax cre iso							Cd300a fl/fl anti-IFN beta							Cd300a fl/fl Itgax cre anti-IF
	WT	Cd300a-/-	WT	Cd300a-/-			0	0	0	0	0	0	0	0	0	0	0	0	0	0	0	0	0	0	0	0	0	0	0	0	0	0	0	0
1	121881	102856	92625	70664			7	0	0.0185917	0.0343584	0.00265733	0.0263344	0.00423068	0.0637198	0.0427407	0.0471179	0.0206698	0.0101413	0.0151465	0.119701	0	0.029534	0.00794751	0.0237372	0.0264383	0.0843586	0.0133244	0	0.0662342	0.00578724	0.00476196	0.0922285	0.0349468	0.0445776
2	80895	197121	54113	84680			11	0.00147287	0.278505	0.273762	0.0111713	0.480175	0.106149	0.55118	0.436119	0.205686	0.0819745	0.0699768	0.245408	0.633374	0.163256	0.127358	0.025517	0.176927	0.2049	0.493588	0.223955	0.146951	0.167144	0.0247275	0.0323893	0.358988	0.25109	0.372367
3	143790	149522	63324	64147			14	0.0290229	0.904842	0.568569	0.110006	0.197435	0.90785	0.591388	1.1131	0.638946	0.36364	0.191482	0.60961	1.36564	0.895151	0.275241	0.17685	0.399466	0.945263	0.202639	1.03123	0.669076	0.553382	0.147906	0.111706	0.210615	0.395141	0.646082
4	102573	157163	76146	75303			18	0.210689	3.92969	2.24056	0.612181	2.05144	4.69932	3.02325	3.89238	2.47325	4.02506	1.91147	2.78521	6.08525	2.75775	1.79374	0.93551	1.68457	4.04529	1.85516	4.28856	2.3028	2.55678	1.06125	0.922438	1.25458	2.69596	0.646082
5	104806	164025	80262	56801			21	0.77047	6.47195	3.56442	0.612181	3.02726	6.08298	3.70313	5.75729	4.02934	4.82524	3.96215	4.49912	6.7294	5.72779	3.33928	2.27931	2.92058	6.55891	2.87847	6.35427	5.2351	4.16934	2.17991	2.14521	1.42129	3.61605	0.646082
6	106648	187647					25	4.5639	6.32846	2.33456	0.612181	4.68638	6.08298	5.51829	12.0532	8.24785	4.82524	7.6738	6.90555	9.59099	5.72779	7.95469	4.23688	4.59754	6.55891	5.99477	8.73556	5.2351	7.67244	4.7952	4.69986	2.28466	3.61605	0.646082
7	74382	79327
C.
Treatment	WT						CD300a-/-
	1	2	3	4	5	6	1	2	3	4	5	6
PBS	22	37	15	18			35	153	107	75	79
GW4869	8	11	12	5	42	31	7	14	39	73	14	16
D.
days	WT PBS						CD300a-/- PBS							WT GW4889									CD300a-/- GW4869
	1	2	3	4	5	6	1	2	3	4	5	6	7	1	2	3	4	5	6	7	8	9	1	2	3	4	5	6	7	8	9
0	0	0	0	0	0	0	0	0	0	0	0	0	0	0	0	0	0	0	0	0	0	0	0	0	0	0	0	0	0	0	0
14	169.6	65.4	18.8	179.5	14.1	267.9	732	628	282.1	381.5	628	179.5	267.9	113	65.4	65.4	301.4	14.1	4.2	4.2	4.2	113	65.4	267.9	523.3	523.3	78.5	14.1	113	65.4	14.1
19	575.7	471	169.6	523	65.4	368.4	2119.5	1149.8	1149.8	523.3	1238.2	301.4	466.3	205.1	65.4	33.5	680.3	65.4	65.4	65.4	65.4	267.9	113	696.6	628	1149.8	104.7	65.4	131.9	205.1	65.4
21	1130.4	1415.1	466.3	759.9	466.3	1238.2	4846.6	3589.5	2411.5	1743.7	1766.3	1326.7	696.6	696.6	113	267.9	1415.1	113	65.4	65.4	179.5	904.3	179.5	1436	1436	1766	256.4	205.1	696.6	759.9	205.1
25	4186.7	2119.5	979.7	904.3	1149.8	2545.5	6585.6	6079	4605.3	4239	5825.7	2571.1	1884	2571.1	1436	1436	3967.4	423.9	256.4	104.7	423.9	2143.6	1149.8	4186.7	4186.7	4186	823.2	267.9	1436	2143.6	267.9
E.
	Cd300afl/fl PBS			Cd300afl/fl GW4869				Itgx Cre Cd300afl/fl PBS						Itgx Cre Cd300afl/fl GW4869
0	0	0	0	0	0	0	0	0	0	0	0	0	0	0	0	0	0	0	0
7	4.66219	100.441	0	15.9004	0.906006	75.7378	0	23.5792	55.6577	54.2867	24.5322	0	0	17.3337	20.7155	16.2575	5.01253	9.5884	0
11	87.6986	423.289	0	332.608	10.4142	323.943	0	518.7	656.907	211.23	322.003	0	0	146.152	206.446	161.17	253.802	190.006	0
13	296.507	657.461	710.005	738.188	16.5384	844.648	1715.84	1419.65	1052.03	582.504	706.021	1355.57	2642.66	392.699	791.681	285.26	361.37	341.169	442.235
17	1027.74	1465.37	1765.16	2931.77	277.911	1679.2	2510.86	4248.2	2945.08	1749.58	2907.26	3235.54	4956.66	1780.36	1650.69	896.632	527.814	1545.07	628.318
20	2550.29	3889.83	4502.33	3812.65	1171.45	3001.94	7716.23	6109.8	6048.99	5109.05	8417.16	6129.45	8555.87	3818.56	3441.94	1565.68	1282.52	3197.97	1830.45
25	4375.49	5272.2	7034.34	7026.01	2019.82	6433.72	7716.23	11443.3	9688.18	8450.15	8784.84	11352.6	8555.87	8721.07	3441.94	4196.91	4043.8	6517.12	4944.27
