# Supplementary material for: Tumor-derived extracellular vesicles regulate tumor-infiltrating regulatory T cells via the inhibitory immunoreceptor CD300a
Source: eLife. 2021 Nov 9;10:e61999. doi: 10.7554/eLife.61999 (PMC8577836; doi:10.7554/eLife.61999)
Supplement: Figure 5—figure supplement 2—source data 1. [file elife-61999-fig5-figsupp2-data1.xlsx]

## Sheet: Supplemental Fig4_source data 1
	B.
	LPS				poly(I;C)
	DMSO	TLR4 inh	TLR3 inh		DMSO	TLR4 inh	TLR3 inh
1	13.8	4.3	32.3		5.9	11.1	5.7
2	21	4.7	13.6		7	12.1	3.1
3	15.1	5.1	29.9		5.3	7.8	3.3
4	5.1	5.8	4.1		6.7	20.1	5.9
5	6.9	4.2	4.4		9.2	14.7	7.2
6	8.3	5.1	5.4		10.9	18.6	7.3
7	5.9	5.1	19.4		15.9	17.3	2.7
8	5.4	6.9	21.1		18.6	12.5	1.3
9	6.5	2.8	13.6		23.6	13.1	1.4
10	33				29.7
11	29				34.8
12	36				24.4
