# Supplementary material for: Tumor-derived extracellular vesicles regulate tumor-infiltrating regulatory T cells via the inhibitory immunoreceptor CD300a
Source: eLife. 2021 Nov 9;10:e61999. doi: 10.7554/eLife.61999 (PMC8577836; doi:10.7554/eLife.61999)
Supplement: Figure 5—source data 1. [file elife-61999-fig5-data1.xlsx]

## Sheet: Fig5_source data 1
B.
	WT	CD300a-/-
1	15.52	31.1
2	22.44	29.62
3	52.83	30.87
4	25	15.66
5	34.48	18.01
D.
Treatment	WT									CD300a-/-
	1	2	3	4	5	6	7	8	9	1	2	3	4	5	6	7	8	9	10
DMSO	1.6	0.6	1.8	1.9	1.9	0.2	0.3	0.7	0.3	13.7	11.2	3.7	1.1	11.1	2.4	1.1	1.3	2.2	4.8
TLR4 inh	1.5	0.6	0.2	0.4	0.1	1.8	2.5			18.2	4	1.6	6.05	6	4.7	1.8
TLR3 inh	0.27	0.4	0.28	3.31	3.11	1.39				0.58	1.39	0.14	5.05	2.56	0.56
E.
	WT		CD300a-/-		Ticam-1-/-		Ticam-1-/- CD300a-/-
Evs	(-)	(+)	(-)	(+)	(-)	(+)	(-)	(+)
	1.857	1.35	1.432	1.769	1.313	1.023	0.506	1.6
	0.588	0.721	2.039	27.241	0.303	1.216	3.347	0.845
	0.556	1.07	0.314	6.288	0.155	1.131	1.397	4.766
	0.334	3.77	0.299	9.758	2.679	0.89	2.942	1.029
	1.66	4.213	5.028	1.416	1	0.647	0.905	0.954
G.
Days	Ticam-1-/-						Ticam-1 Cd300a -/-
	1	2	3	4	5	6	1	2	3	4	5	6	7	8	9
0	0	0	0	0	0	0	0	0	0	0	0	0	0	0	0
10	0.092	0.188	0.335	0.256	0.335	0.335	0.23	0.267	0.423	0.09	0.23	0.23	0.18	0.09	0.23
18	3.052	1.766	2.571	2.722	1.055	1.055	2.28	2.14	4.19	0.523	1.88	2	1.15	0.04	1.44
21	4.186	3.024	4.847	2.722	4.186	3.391	4.6	4.6	4.85	1.33	4.4	3.97	2.14	0.7	3.9
25	9.198	8.177	8.831	5.572	5.077	5.826	8.33	9.2	6.08	4.6	6.92	8.14	5.02	2.57	7.47
H
Days	Ticam1-/-	Ticam1-/- CD300a-/-
26	1
46	1	1
15	1
46		1
22	1
48	1
34		1
46		1
30		1
43		1
30		1
45	1	1
43		1
I.
Days	MyD88-/-									MyD88-/- Cd300a-/-
	1	2	3	4	5	6	7	8	9	1	2	3	4	5	6	7	8	9	10
0	0	0	0	0	0	0	0	0	0	0	0	0	0	0	0	0	0	0	0
10	0	0.019	0.001	0	0.065	0.065	0.014	0.033	0	0.18	0.065	0.151	0	0.18	0	0	0.033	0.065	0
14	0	0.131	0.021	0.001	0.205	0.256	0.301	0.231	0	0.523	0.424	0.68	0.004	0.424	0.024	0.113	0.132	0.192	0.113
17	0.001	0.18	0.551	0.03	0.904	0.95	0.823	0.382	0.113	1.24	1.33	1.33	0.18	1.44	0.151	0.382	1.24	0.904	0.576
21	0.033	1.21	0.567	0.18	2.57	2.12	1.88	1.44	0.205	2.14	2.55	2.55	0.301	2.28	0.523	0.904	2.57	2.12	0.733
25	0.18	2.41	0.98	0.268	2.87	4.85	4.85	4.15	1.33	7.54	7.24	7.24	2.57	8.18	0.904	1.88	4.85	3.78	1.74
J.
Days	MyD88-/-	MyD88-/- CD300a-/-
27	1	1
30		1
43	1	1
47	1
54	1
21		1
26		1
29		1
37		1
27	1
58	1
50	1
50	1
27		1
29		1
40		1
56	1
